# Supplementary material
Source: PubMed Central journal article supplement (PMC4793873)
Supplement: sant018494.wt1_default.pdf [file sant018494.wt1_default.pdf]

Diagnosis codes of mental disorders - primary and subsidiary diagnosis from Finnish Hospital Discharge Register (HDR)

|                          |                                                                                                                                                               |
|--------------------------|---------------------------------------------------------------------------------------------------------------------------------------------------------------|
| Any disorder (n=4,341*)  | ICD-8†: 291, 295, 296-305, 306.4-306.5, 306.98, 307; ICD-9: 291-292, 295-298, 300-304, 305, 3071A-3075B, 3078A, 3079X, 3090A, 3092C-3099X, 312; ICD-10: F1-F6 |
| Substance use‡ (n=1,891) | ICD-8: 291, 303-304; ICD-9: 291-292, 303-305; ICD-10: F10-F19                                                                                                 |
| Psychotic§ (n=1,051)     | ICD-8: 295, 297, 298.10-299.99; ICD-9: 295, 297-298; ICD-10: F20-F29                                                                                          |
| Mood¶ (n=1,594)          | ICD-8: 296, 298.00, 300.40, 300.41, 301.10; ICD-9: 296, 3004A, 3011D; ICD-10: F30-F39                                                                         |
| Anxiety** (n=1,003)      | ICD-8: 300.00-300.30, 300.50-300.99, 305, 306.80, 307.99; ICD-9: 3000A-3003A, 3006A-3009X, 3078A, 309, ICD-10: F40-F48                                        |

Abbreviations: ICD, International Classification of Diseases.

\*Number of individuals with at least one primary or subsidiary diagnosis of the particular diagnose category. Behavioural syndromes associated with physiological disturbances and physical factors (F50-F59) and Personality (F60-F69) were included in Any mental disorders but not included as separate category because of heterogeneity and small number of positive observations.

†The eight revision of the international classification of diseases, ICD-8, was in use between 1969-1986, ICD-9 between 1987-1995, and ICD-10 has been in use since 1996.

‡The WHO manual for ICD-10 mental and behavioral disorders (1992) defines F10-F19 as mental and behavioral disorders due to psychoactive substance use.

§F20-F29 are defined as schizophrenia, schizotypal, and delusional disorders.

¶F30-F39 are defined as mood or affective disorders.

\*\*F40-F48 are defined as neurotic, stress-related and somatoform disorders.
